# Supplementary material
Source: publisher figshare collection journal article supplement (https://tandf.figshare.com/articles/dataset/_/18319201)
Supplement: Supplementary file 1 [file 2]

**Supplementary data 2: Job-exposure matrix for physical work load, based on the International Standard Classification of Occupations (ISCO-08)**

Title of paper: Occupational cold exposure is associated with neck pain, low back pain, and lumbar radiculopathy

Authors: Albin Stjernbrandt, Erlend Hoftun Farbu

Journal: Ergonomics (Taylor & Francis)

| Code | Occupational title                                          | Physical work load |
|------|-------------------------------------------------------------|--------------------|
| 0    | Armed forces occupations                                    |                    |
| 01   | Commissioned armed forces officers                          | High               |
| 02   | Non-commissioned armed forces officers                      | High               |
| 03   | Armed forces occupations, other ranks                       | High               |
| 1    | Managers                                                    |                    |
| 11   | Chief executives, senior officials and legislators          | Low                |
| 12   | Administrative and commercial managers                      | Low                |
| 13   | Production and specialized services managers                | Low                |
| 14   | Hospitality, retail and other services managers             | Low                |
| 15   | Health care and community services managers                 | Low                |
| 16   | Banking, financial and insurance services managers          | Low                |
| 17   | Other services managers                                     | Low                |
| 2    | Professionals                                               |                    |
| 21   | Science and engineering professionals                       | Low                |
| 22   | Health professionals                                        | Low                |
| 23   | Teaching professionals                                      | Low                |
| 24   | Business and administration professionals                   | Low                |
| 25   | Information and communications technology professionals     | Low                |
| 26   | Legal, social and cultural professionals                    | Low                |
| 3    | Technicians and associate professionals                     |                    |
| 31   | Science and engineering associate professionals             | Low                |
| 32   | Health associate professionals                              | Low                |
| 33   | Business and administration associate professionals         | Low                |
| 34   | Legal, social, cultural and related associate professionals | Low                |
| 35   | Information and communications technicians                  | Low                |
| 4    | Clerical support workers                                    |                    |
| 41   | General and keyboard clerks                                 | Low                |
| 42   | Customer services clerks                                    | Low                |
| 43   | Numerical and material recording clerks                     | Medium             |
| 44   | Other clerical support workers                              | Low                |
| 5    | Services and sales workers                                  |                    |

|     |                                                               |           |
|-----|---------------------------------------------------------------|-----------|
| 51  | Personal services workers                                     | Medium    |
| 52  | Sales workers                                                 | Medium    |
| 53  | Personal care workers                                         | High      |
| 54  | Protective services workers                                   | Medium    |
| 6   | Skilled agricultural, forestry and fishery workers            |           |
| 61  | Market-oriented skilled agricultural workers                  | High      |
| 62  | Market-oriented skilled forestry, fishery and hunting workers | High      |
| 63  | Subsistence farmers, fishers, hunters and gatherers           | High      |
| 7   | Craft and related trades workers                              |           |
| 71  | Building and related trades workers (excluding electricians)  | High      |
| 72  | Metal, machinery and related trades workers                   | High      |
| 73  | Handicraft and printing workers                               | Medium    |
| 74  | Electrical and electronic trades workers                      | High      |
| 75  | Woodworking, garment trades workers                           | Medium    |
| 76  | Food processing and other craft and related trades workers    | High      |
| 8   | Plant and machine operators and assemblers                    |           |
| 81  | Stationary plant and machine operators                        | Medium    |
| 82  | Assemblers                                                    | High      |
| 83  | Drivers and mobile plant operators                            | Medium    |
| 9   | Elementary occupations                                        |           |
| 91  | Cleaners and helpers                                          | High      |
| 92  | Agricultural, forestry and fishery laborers                   | High      |
| 93  | Laborers in mining, construction, manufacturing and transport | Medium    |
| 94  | Food preparation assistants                                   | Medium    |
| 95  | Street and related sales and services workers                 | Medium    |
| 96  | Refuse workers and other elementary workers                   | High      |
| 10  | Others                                                        |           |
| 100 | Sick leave                                                    | Not coded |
| 101 | Parental leave                                                | Not coded |
| 102 | Unemployed                                                    | Not coded |
| 103 | Students                                                      | Low       |
| 104 | Pensioners                                                    | Not coded |
| 105 | Self-employed                                                 | Medium    |
